# Supplementary material for: Preparation and unique circular dichroism phenomena of urea-functionalized self-folding resorcinarenes bearing chiral termini through asymmetric hydrogen-bonding belts
Source: Royal Society of Chemistry journal article supplement (doi:10.1039/b418880b), 2005-01-01
Supplement: b418880b.pdf [file b418880b.pdf]

ESI (Electronic Supplementary Information)

Preparation and unique circular dichroism phenomena of urea-functionalized self-folding resorcinarenes bearing chiral termini through asymmetric hydrogen bonding belts

Osamu Hayashida,\* Jun-ichi Ito, Shinji Matsumoto, and Itaru Hamachi

| Contents                                                                                                     | Page |
|--------------------------------------------------------------------------------------------------------------|------|
| <b>Fig. S1</b> Partial $^1\text{H}$ NMR spectra of <b>1-S</b> at various concentrations in $\text{CDCl}_3$ . | ii   |
| <b>Fig. S2</b> CD spectra of <b>1-R</b> at various concentrations at 298K.                                   | iii  |
| <b>Fig. S3</b> CD spectrum of <b>10-S</b> in chloroform.                                                     | iv   |
| <b>Fig. S4</b> FAB MS spectrum of 1:1 adducts with $\text{Cl}^-$ .                                           | v    |
| <b>Fig. S5</b> FAB MS spectrum of 1:1 adducts with $\text{Br}^-$ .                                           | vi   |

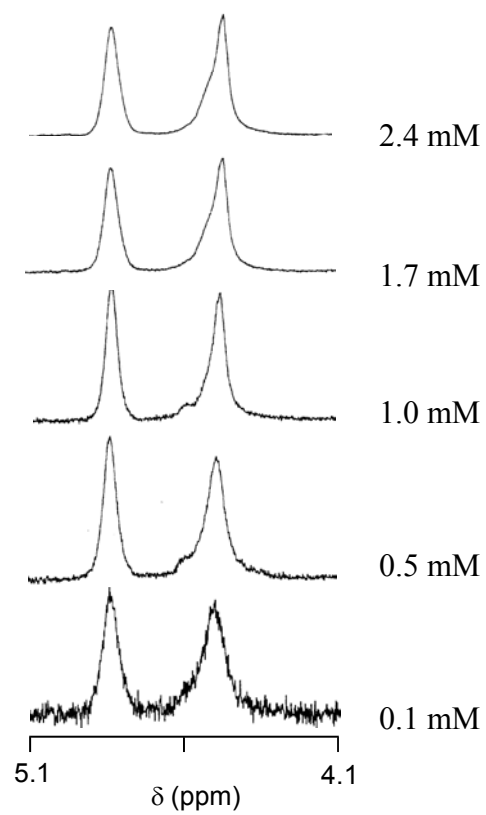

**Fig. S1** Partial  $^1\text{H}$  NMR spectra of **1-S** at various concentrations in  $\text{CDCl}_3$  at 298K

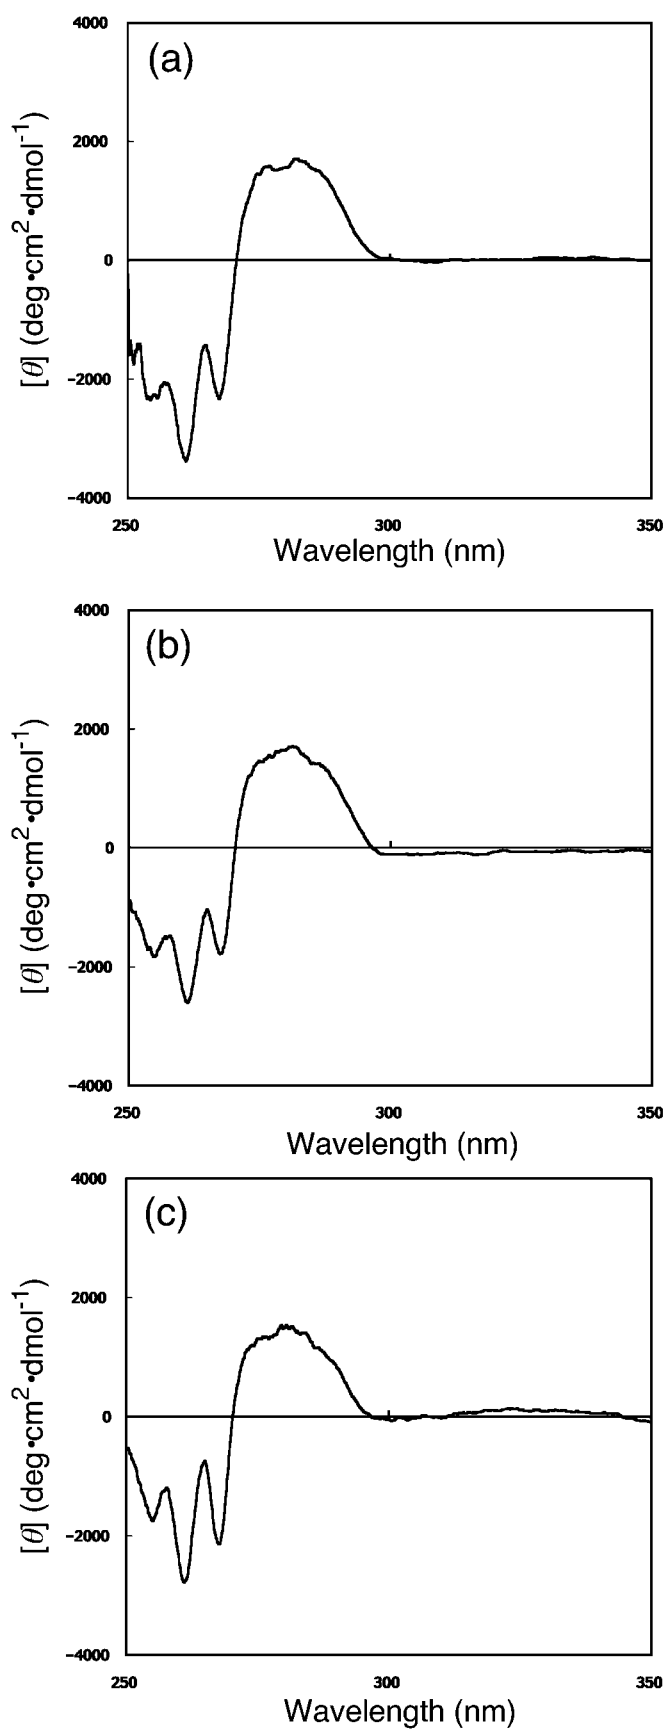

**Fig. S2** CD spectra of **1-R** at various concentrations at 298K: 15  $\mu$ M, cell length 5 cm (A); 78 $\mu$ M, cell length 1 cm (B); 760  $\mu$ M, cell length 0.1cm (C).

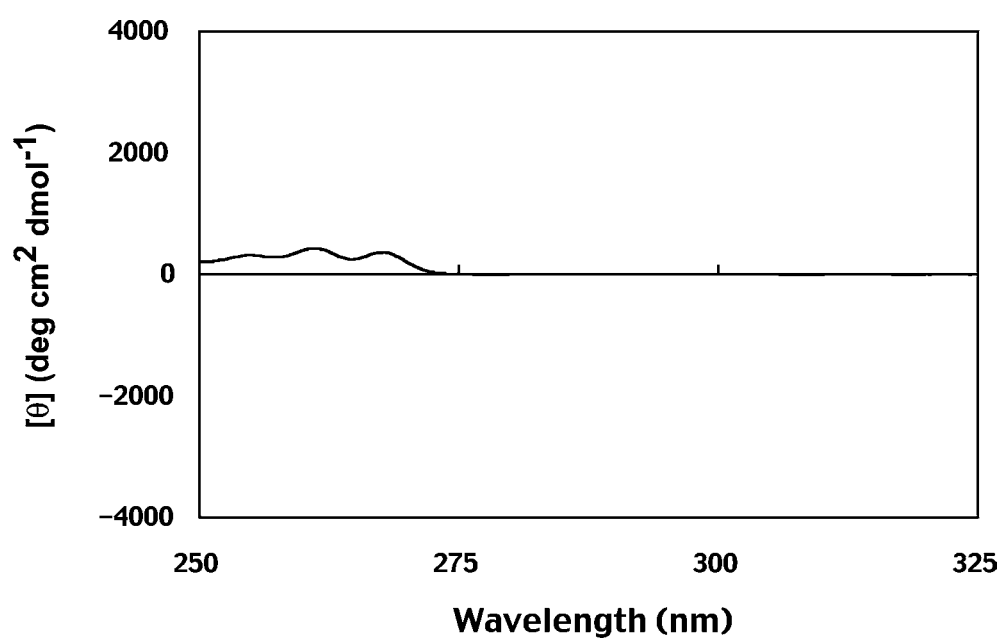

**Fig. S3** CD spectrum of **10-S** in chloroform.

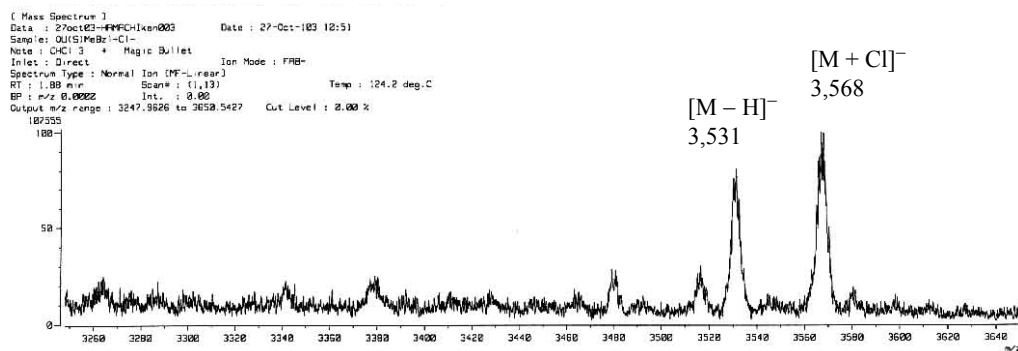

Fig. S4 FAB MS spectrum of 1:1 adducts with Cl<sup>-</sup>.

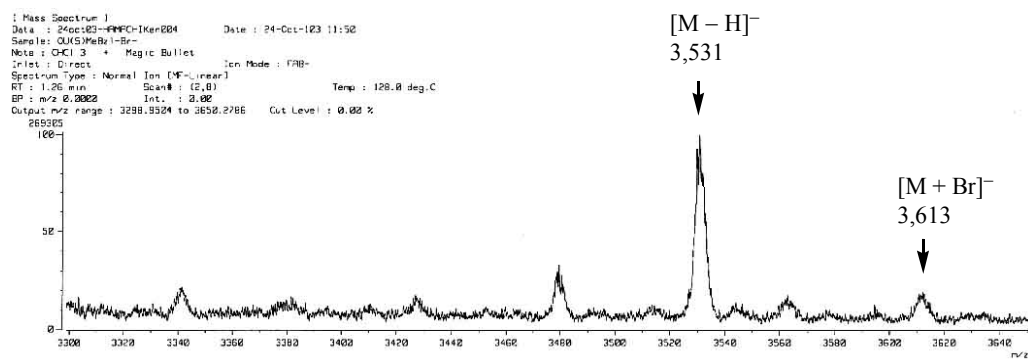

Fig. S5 FAB MS spectrum of 1:1 adducts with Br<sup>-</sup>.
